# Supplementary material
Source: PubMed Central journal article supplement (PMC4426222)
Supplement: NIHMS649363-supplement-01.pdf [file NIHMS649363-supplement-01.pdf]

1 **Supplemental Tables**

2

3 **Table E1. Immunoglobulin levels at different ages for patients with RAC2 deficiency**

| Age (years)    | 1     | 4    | 5    | 6    | 7     | 8    | 9    | 10    | 11   | 12   | 14   | 15   | 16   | 19   | 20   |
|----------------|-------|------|------|------|-------|------|------|-------|------|------|------|------|------|------|------|
| <b>Proband</b> |       |      |      |      |       |      |      |       |      |      |      |      |      |      |      |
| IgM (mg/dl)    | 180   | 40   | 95   | 110  | 30↓   | 42   | 182  | n.a.  | n.a. | n.a. | 73   | 40   | n.a. | 50   | n.a. |
| IgG (mg/dl)    | 1800↑ | 800  | 650↓ | 940  | 430↓* | 380↓ | 600↓ | n.a.  | n.a. | n.a. | 780  | 790  | n.a. | 700  | n.a. |
| IgA (mg/dl)    | 0↓    | 20   | 0↓   | 0↓   | 5↓    | 5↓   | 0↓   | n.a.  | n.a. | n.a. | 30↓  | 40↓  | n.a. | 0↓   | n.a. |
| IgE (IU/ml)    | 9     | n.a. | n.a. | n.a. | <5    | n.a. | n.a. | n.a.  | n.a. | n.a. | n.a. | n.a. | n.a. | n.a. | n.a. |
| <b>Sibling</b> |       |      |      |      |       |      |      |       |      |      |      |      |      |      |      |
| IgM (mg/dl)    | n.a.  | n.a. | n.a. | n.a. | 105   | 190  | 17↓  | 28↓   | 36↓  | 19↓  | 0↓   | n.a. | 21↓  | n.a. | 58   |
| IgG (mg/dl)    | n.a.  | n.a. | n.a. | n.a. | 900   | 750  | 754  | 640↓* | 520↓ | 600↓ | 99↓  | n.a. | 542↓ | n.a. | 130↓ |
| IgA (mg/dl)    | n.a.  | n.a. | n.a. | n.a. | 0↓    | 0↓   | 0↓   | 19↓   | 19↓  | 9↓   | 0↓   | n.a. | 0↓   | n.a. | 10↓  |
| IgE (IU/ml)    | n.a.  | n.a. | n.a. | n.a. | 5.3   | n.a. | n.a. | n.a.  | n.a. | n.a. | <5   | n.a. | n.a. | n.a. | n.a. |

4 *Age-matched reference levels: 1-3 years: IgM, 55-210; IgG, 700-1600; IgA, 19-220; IgE, <100. 4-5 years: IgM, 40-230;*  
5 *IgG, 700-1600; IgA, 48-345. 6-7 years: IgM, 40-230; IgG, 700-1600; IgA, 41-297; IgE, <100. 8-10 years: IgM, 40-230; IgG,*  
6 *700-1600; IgA, 51-297. 11-13 years: IgM, 40-230; IgG, 700-1600; IgA, 44-395. 14 years and older: IgM, 40-230; IgG, 700-*  
7 *1600; IgA, 70-400; IgE, <100. n.a., not analysed. \* Treatment of intravenous immunoglobulin started, with controlled kidney*  
8 *disorder and normal total protein and albumin levels.*

9 **Table E2. IgG subclass levels in the two siblings with RAC2 deficiency**

| IgG subclass level (mg/dl) | Proband                | Sibling                 |
|----------------------------|------------------------|-------------------------|
|                            | <i>At age of 4 yrs</i> | <i>At age of 10 yrs</i> |
| IgG1 (reference values)    | 405 (253-1019)         | 50 ↓ (289-934)          |
| IgG2 (reference values)    | 73 (54-435)            | <15 ↓ (82-516)          |
| IgG3 (reference values)    | 172 ↑ (9-102)          | 12 ↓ (20-103)           |
| IgG4 (reference values)    | 15 (1-108)             | <5 (0.3-111)            |

10 *yr, year. \*Reference: age-appropriate reference range from healthy Iranian individuals.*

11

ACCEPTED MANUSCRIPT

12 **Table E3. Lymphocyte subpopulations in the sibling with RAC2 deficiency**

| Laboratory test                                                                                              | Sibling | Reference range |
|--------------------------------------------------------------------------------------------------------------|---------|-----------------|
| <i>Age at testing</i>                                                                                        | 26 yrs  |                 |
| CD4 <sup>+</sup> CD25 <sup>+</sup> FOXP3 <sup>+</sup> regulatory T-cells (%)                                 | 1.4 ↓   | 3.4-5.66        |
| FOXP3 expression in PBMC (%)                                                                                 | 1.5 ↓   | 2.7-4.8         |
| Regulatory T-cells suppressor capacity (%)                                                                   | 18 ↓    | 30-80           |
| CD45RA <sup>+</sup> CD62L <sup>+</sup> CD4 <sup>+</sup> naïve T-cells (%)                                    | 17.4 ↓  | 35-54           |
| CD31 <sup>+</sup> CD45RA <sup>+</sup> CD62L <sup>+</sup> CD4 <sup>+</sup> recent thymic emigrant T-cells (%) | 26.4 ↓  | 32-50           |
| <i>Age at testing</i>                                                                                        | 28 yrs  |                 |
| NK-cells (%)                                                                                                 | 11.7    | 3-22            |
| CD19 <sup>+</sup> (%)                                                                                        | 0 ↓     | 6-23            |
| CD3 <sup>+</sup> (%)                                                                                         | 87↑     | 56-84           |
| CD4 <sup>+</sup> (%)                                                                                         | 26↓     | 31-52           |
| CD8 <sup>+</sup> (%)                                                                                         | 57 ↑    | 18-35           |
| CD4:CD8                                                                                                      | 0.5 ↓   | 1.0-3.6         |
| NKT-cells (%)                                                                                                | 7.7     | 2.1-13.7        |
| CD4 <sup>-</sup> CD8 <sup>-</sup> T-cells (%)                                                                | 3.8     | 3-10.2          |
| CD4 <sup>+</sup> CD8 <sup>-</sup> T-cells (%)                                                                | 0.6     | 0.2-1.4         |
| CD4 <sup>+</sup> CD38 <sup>+</sup> T-cells (%)                                                               | 51      | 50-79           |
| CD4 <sup>+</sup> HLA-DR <sup>+</sup> T-cells (%)                                                             | 30 ↑    | 5-25            |
| CD4 <sup>+</sup> CD38 <sup>+</sup> HLA-DR <sup>+</sup> T-cells (%)                                           | 10 ↑    | 2-6             |
| CD8 <sup>+</sup> CD38 <sup>+</sup> T-cells (%)                                                               | 55      | 33-80           |
| CD8 <sup>+</sup> HLA-DR <sup>+</sup> T-cells (%)                                                             | 66 ↑    | 5-25            |
| CD8 <sup>+</sup> CD38 <sup>+</sup> HLA-DR <sup>+</sup> T-cells (%)                                           | 42 ↑    | 3-18            |
| CCR7 <sup>+</sup> CD45RA <sup>+</sup> CD45RO <sup>-</sup> CD4 <sup>+</sup> naïve T-cells (%)                 | 9.8 ↓   | 20.2-51.1       |
| Effector memory CD4 <sup>+</sup> T-cells (%)                                                                 | 55.2    | 27.5-56.8       |
| T-helper-1 cells (%)                                                                                         | 21.0    | 4.5-25.5        |
| T-helper-2 cells (%)                                                                                         | 3.1     | 1.5-11.3        |
| Central memory CD4 <sup>+</sup> T-cells (%)                                                                  | 10.2    | 7.7-17.5        |
| T-cells (naïve:effector memory)                                                                              | 0.2 ↓   | 0.3-3.2         |
| Th17-cells                                                                                                   | 39.4 ↑  | 15.1-37.0       |
| Naïve CD8 <sup>+</sup> T-cells (%)                                                                           | 1.8 ↓   | 28.4-66.7       |
| Effector memory CD8 <sup>+</sup> T-cells (%)                                                                 | 67.0 ↑  | 11.5-42.6       |
| Activated effector memory CD8 <sup>+</sup> T-cells (%)                                                       | 1.9     | 0-22.4          |
| Activated cytolytic effector CD8 <sup>+</sup> T-cells (%)                                                    | 0.2     | <5.9            |
| Effector CD8 <sup>+</sup> T-cells (%)                                                                        | 15.9    | 7.4-24.6        |
| Central memory CD8 <sup>+</sup> T-cells (%)                                                                  | 1.0     | 0.5-5.6         |

13 *yr, year; PBMC, peripheral blood mononuclear cells*

14 **Table E4. Comparison of cases with RAC2 deficiency**

| Parameters                        | Proband                                                                                                                                               | Sibling                                                                                                                                                          | Colorado Case <sup>7,8</sup>                                                                                               | Wisconsin case <sup>9</sup>                                           |
|-----------------------------------|-------------------------------------------------------------------------------------------------------------------------------------------------------|------------------------------------------------------------------------------------------------------------------------------------------------------------------|----------------------------------------------------------------------------------------------------------------------------|-----------------------------------------------------------------------|
| Gender                            | Female                                                                                                                                                | Male                                                                                                                                                             | Male                                                                                                                       | Male                                                                  |
| Mutation                          | W56X Hom                                                                                                                                              | W56X Hom                                                                                                                                                         | D57N Het                                                                                                                   | D57N Het                                                              |
| Effect of mutation                | Absent expression                                                                                                                                     | Absent expression                                                                                                                                                | Dominant negative                                                                                                          | Dominant negative                                                     |
| Age at onset of clinical symptoms | 6 months                                                                                                                                              | 2 years                                                                                                                                                          | 5 weeks                                                                                                                    | 26 days                                                               |
| Age at genetic diagnosis          | 19 years                                                                                                                                              | 23 years                                                                                                                                                         | Within 10 months of life                                                                                                   | Within 5 weeks of life                                                |
| Clinical features                 | Recurrent pneumonia, hypogammaglobulinemia, PSGN, factor XI deficiency, urticaria, allergy, bronchiectasis, hypothyroidism, hyperparathyroidism, ESRD | Recurrent sinopulmonary infections, hypogammaglobulinemia, urticaria, PSGN, factor XI deficiency, lymphadenopathy, bronchiectasis, hypothyroidism, GH deficiency | Recurrent perirectal abscess, umbilical stump involution failure, infected urachal cyst, failure of surgical wound healing | Periumbilical erythema, macrocytic anemia, paratracheal abscess       |
| WBC/mm <sup>3</sup>               | Normal                                                                                                                                                | Normal                                                                                                                                                           | High                                                                                                                       | High                                                                  |
| Neutrophils (%)                   | Normal                                                                                                                                                | Normal                                                                                                                                                           | High                                                                                                                       | High                                                                  |
| Lymphocytes (%)                   | Reduced                                                                                                                                               | Reduced                                                                                                                                                          | Low-normal                                                                                                                 | Reduced/normal                                                        |
| T-cells (%)                       | Normal                                                                                                                                                | Normal                                                                                                                                                           | Low-normal                                                                                                                 | Reduced/normal                                                        |
| B-cells (%)                       | Reduced                                                                                                                                               | Normal at age 7 yrs, reduced at age 28 yrs                                                                                                                       | Low-normal                                                                                                                 | Reduced/normal                                                        |
| IgM (mg/dl)                       | Normal then reduced                                                                                                                                   | Normal then reduced                                                                                                                                              | Normal                                                                                                                     | Reduced                                                               |
| IgG (mg/dl)                       | Normal then reduced                                                                                                                                   | Normal then reduced                                                                                                                                              | Normal                                                                                                                     | Normal                                                                |
| IgA (mg/dl)                       | Reduced                                                                                                                                               | Reduced                                                                                                                                                          | Normal                                                                                                                     | Reduced                                                               |
| Neutrophil chemotaxis             | n.a.                                                                                                                                                  | Moderately reduced                                                                                                                                               | Markedly reduced                                                                                                           | Markedly reduced                                                      |
| Oxidative burst*                  | Normal                                                                                                                                                | n.a.                                                                                                                                                             | Normal                                                                                                                     | Normal                                                                |
| CD18 <sup>+</sup> (%)             | Normal                                                                                                                                                | n.a.                                                                                                                                                             | n.a.                                                                                                                       | Normal                                                                |
| CD11a <sup>+</sup> (%)            | Slightly increased                                                                                                                                    | n.a.                                                                                                                                                             | n.a.                                                                                                                       | n.a.                                                                  |
| CD11b <sup>+</sup> (%)            | Slightly increased                                                                                                                                    | n.a.                                                                                                                                                             | Normal                                                                                                                     | Normal                                                                |
| CD11c <sup>+</sup> (%)            | Increased                                                                                                                                             | n.a.                                                                                                                                                             | Normal                                                                                                                     | n.a.                                                                  |
| C3 (mg/dl)                        | Slightly reduced                                                                                                                                      | Normal                                                                                                                                                           | Reduced/normal**                                                                                                           | n.a.                                                                  |
| C4 (mg/dl)                        | Normal                                                                                                                                                | Normal                                                                                                                                                           | n.a.                                                                                                                       | n.a.                                                                  |
| KRECs                             | Reduced                                                                                                                                               | Reduced                                                                                                                                                          | n.a.                                                                                                                       | n.a.                                                                  |
| TRECs                             | Reduced                                                                                                                                               | Reduced                                                                                                                                                          | n.a.                                                                                                                       | Reduced                                                               |
| Organisms isolated                | <i>Streptococcus pneumoniae</i>                                                                                                                       | <i>Streptococcus pneumoniae</i>                                                                                                                                  | <i>Escherichia coli</i> ,<br><i>Enterococcus</i> species and<br><i>Pseudomonas aeruginosa</i>                              | <i>Stenotrophomonas</i><br>and <i>Prevotella</i> species              |
| Treatment                         | Antibiotics, IVIG, immunosuppressive therapy, levothyroxine, renal transplant                                                                         | Antibiotics, IVIG, immunosuppressive therapy, levothyroxine                                                                                                      | Antibiotics, prednisolone, granulocyte transfusion, BMT                                                                    | Surgical debridement, abscess drainage, granulocyte transfusion, HSCT |
| Outcome                           | Dead at 21 years from transplant rejection and suspected cerebral hemorrhage                                                                          | Alive                                                                                                                                                            | Cured after BMT                                                                                                            | Cured after HSCT                                                      |

15 yr, year; Het, heterozygous; Hom, homozygous; PSGN, post-streptococcal glomerulonephritis; ESRD, end-stage renal disease; WBC, white  
 16 blood cells; GH, growth hormone; n.a., not analyzed; KRECs, kappa-deleting recombination excision circles; TRECs, T-cell receptor  
 17 excision circles; IVIG, intravenous immunoglobulin; BMT, allogeneic bone-marrow transplantation; HSCT, allogeneic cord-blood  
 18 hematopoietic stem cell transplantation.

19 \* Oxidative burst tested using phorbol myristate acetate.

20 \*\* Serum complement is mentioned to be reduced and normal in references 8 and 9, respectively.

21 N.B. All clinical immunological details of the previously reported cases may be found in references 8 and 9 (Colorado case) and 10  
 22 (Wisconsin case).  
 23



## 6 **Supplemental Methods**

7

### 8 *Clinical investigations*

9 Informed consent for this study was obtained from the proband and her relatives in  
10 accordance with the principles of the ethics committee of the Tehran University of Medical  
11 Sciences.

12

### 13 *Immunological analyses*

14 During follow-up, we performed different investigations according to previously published  
15 methods including complete blood counts, serum immunoglobulins levels<sup>1</sup>, vaccine  
16 responses<sup>2</sup>, frequency and/or function of regulatory T-cells (Tregs)<sup>3</sup>, naïve T-cell<sup>4</sup> and recent  
17 thymic emigrant T-cells<sup>4</sup>. Neutrophil chemotaxis assay was performed using zymosan-  
18 activated serum as previously described<sup>5</sup>.

19

### 20 *Measure the serum level of BAFF*

21 The concentration of BAFF was assessed in stored serum samples using the Human BAFF  
22 (TNFSF13B) SimpleStep ELISA™ Kit (Abcam, Cambridge, UK) following the  
23 manufacturer's instructions. Two healthy controls were included. Statistical analysis (non-  
24 parametric analysis [Kruskal-Wallis test]) was performed using the Excel software.

25

### 26 *Flow cytometric immunophenotyping*

27 Venous blood was collected in EDTA tubes and the samples were processed within 36 h.  
28 Antibody combinations were used for polychromatic 8-color surface staining panels and were  
29 optimized as previously published<sup>6</sup>.

30

### 31 *Whole exome sequencing (WES) and validation by Sanger sequencing*

32 The methods for DNA library preparation, read mapping, variant analysis, and analysis  
33 protocol for WES were performed as described previously<sup>1</sup>. Sanger sequencing using specific  
34 primers (forward GGAATGACATGGAGCTGGAC and reverse  
35 AAGATGGGCACATTGAGGAC) was performed to validate the potential disease-causing  
36 variant. The PCR reactions were performed as described previously<sup>1</sup>. The purified PCR  
37 products were sequenced by Macrogen Incorporated (South Korea).

38

### 39 **References**

- 40 1. Abolhassani H, Wang N, Aghamohammadi A, Rezaei N, Lee YN, Frugoni F, et al. A  
41 hypomorphic recombination-activating gene 1 (RAG1) mutation resulting in a  
42 phenotype resembling common variable immunodeficiency. *J Allergy Clin Immunol*  
43 2014;doi: 10.1016/j.jaci.2014.04.042.
- 44 2. Rezaei N, Siadat SD, Aghamohammadi A, Moin M, Pourpak Z, Norouzian D, et al.  
45 Serum bactericidal antibody response 1 year after meningococcal polysaccharide  
46 vaccination of patients with common variable immunodeficiency. *Clin Vaccine*  
47 *Immunol* 2010; 17:524-8.
- 48 3. Arandi N, Mirshafiey A, Jeddi-Tehrani M, Abolhassani H, Sadeghi B, Mirminachi B,  
49 et al. Evaluation of CD4<sup>+</sup>CD25<sup>+</sup>FOXP3<sup>+</sup> regulatory T cells function in patients with  
50 common variable immunodeficiency. *Cell Immunol* 2013; 281:129-33.
- 51 4. Oraei M, Aghamohammadi A, Rezaei N, Bidad K, Gheflati Z, Amirkhani A, et al.  
52 Naive CD4<sup>+</sup> T cells and recent thymic emigrants in common variable  
53 immunodeficiency. *J Investig Allergol Clin Immunol* 2012; 22:160-7.
- 54 5. Leavey PJ, Sellins KS, Thurman G, Elzi D, Hiester A, Silliman CC, et al. In vivo  
55 treatment with granulocyte colony-stimulating factor results in divergent effects on  
56 neutrophil functions measured in vitro. *Blood* 1998; 92:4366-74.

- 57 6. Boldt A, Borte S, Fricke S, Kentouche K, Emmrich F, Borte M, et al. Eight-color  
58 immunophenotyping of T-, B-, and NK-cell subpopulations for characterization of  
59 chronic immunodeficiencies. *Cytometry B Clin Cytom* 2014; 86:191-206.
- 60 7. Ambruso DR, Knall C, Abell AN, Panepinto J, Kurkchubasche A, Thurman G, et al.  
61 Human neutrophil immunodeficiency syndrome is associated with an inhibitory Rac2  
62 mutation. *Proc Natl Acad Sci U S A* 2000; 97:4654-9.
- 63 8. Kurkchubasche AG, Panepinto JA, Tracy TF, Jr., Thurman GW, Ambruso DR.  
64 Clinical features of a human Rac2 mutation: a complex neutrophil dysfunction  
65 disease. *J Pediatr* 2001; 139:141-7.
- 66 9. Accetta D, Syverson G, Bonacci B, Reddy S, Bengtson C, Surfus J, et al. Human  
67 phagocyte defect caused by a Rac2 mutation detected by means of neonatal screening  
68 for T-cell lymphopenia. *J Allergy Clin Immunol* 2011; 127:535-8 e1-2.
